# Supplementary material for: A mechanism of Rap1-induced stabilization of endothelial cell–cell junctions
Source: PubMed Central journal article supplement — Mol Biol Cell. 2011 Jul 15;22(14):2509–19. doi: 10.1091/mbc.E11-02-0157 (PMC3135476; doi:10.1091/mbc.e11-02-0157), 2011-07-15

# Supplemental Figure 1

KRIT1(R452E)

tubulin

merge

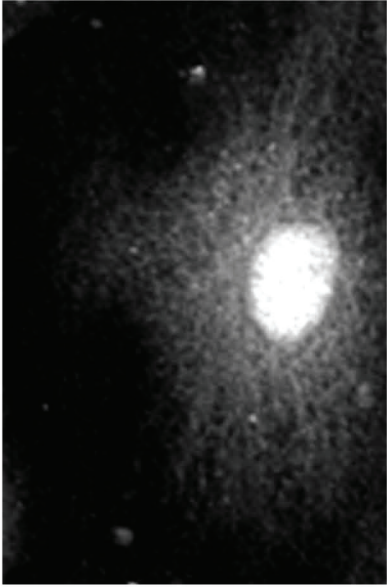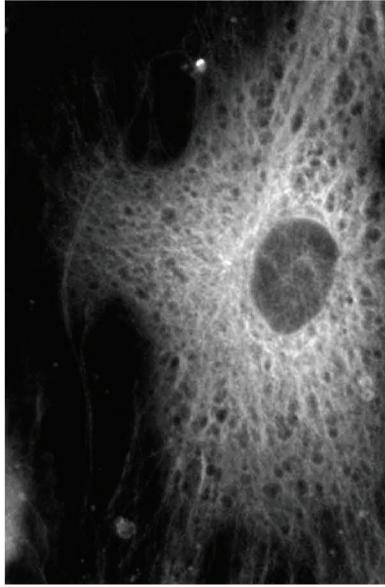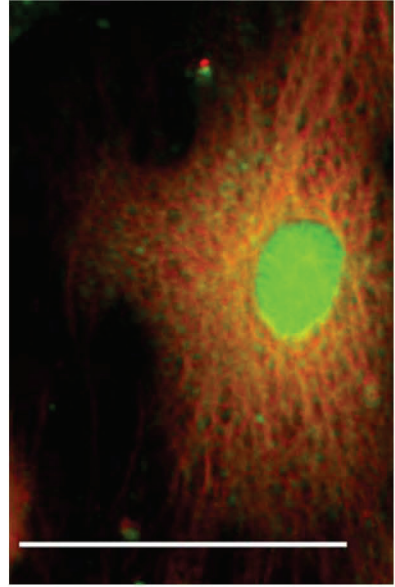

# Supplemental Figure 2

add nocodazole

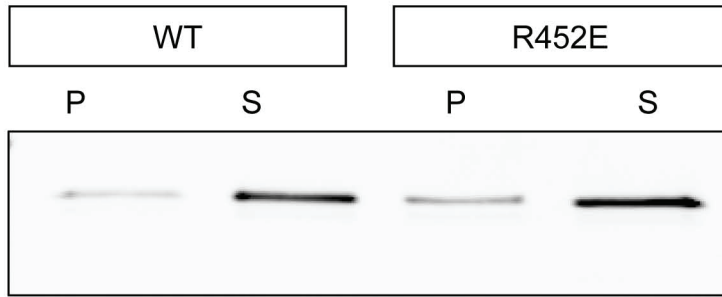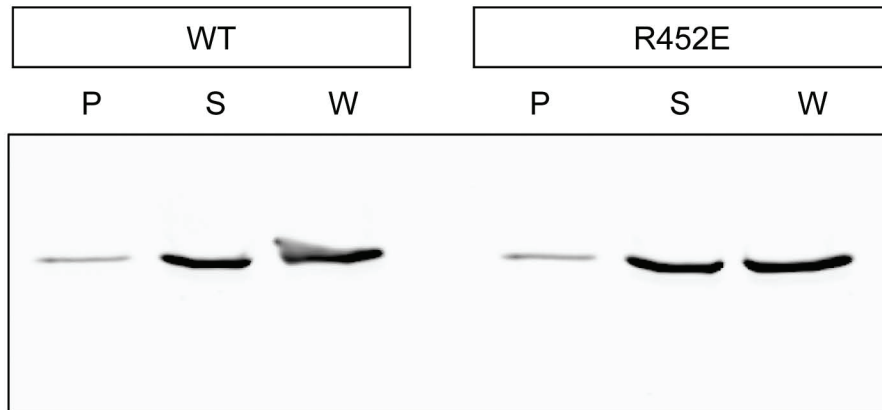

# Supplemental Figure 3

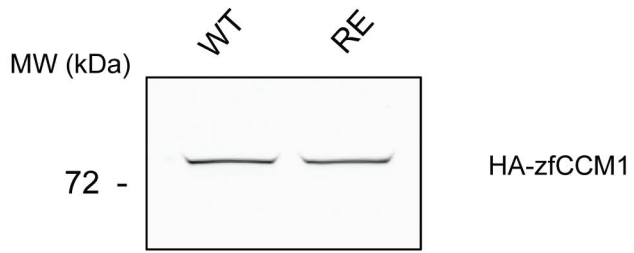

Supplement: E11-02-0157_1.pdf [file E11-02-0157_1.pdf]
